# Supplementary material
Source: PubMed Central journal article supplement (PMC3671609)
Supplement: NIHMS458189-supplement-Supplemental_Table_5.pdf [file NIHMS458189-supplement-Supplemental_Table_5.pdf]

**Supplemental Table 5.** Association between *TMPRSS2:ERG* fusion and prostate cancer outcomes broken out by assay used to assess fusion status (radical prostatectomy specimens only), results from the meta-analysis

| <b>Outcome</b>                            | <b>RR Stage <math>\geq</math><br/>pT3 (95% CI)<br/># Cohorts</b> | <b>RR Gleason &gt; 7<br/>(95% CI)<br/># Cohorts</b> | <b>RR Recurrence<br/>(95% CI)<br/># Cohorts</b> | <b>RR Mortality<br/>(95% CI)<br/># Cohorts</b> | <b>WMD Age<br/>(95% CI)<br/># Cohorts</b> |
|-------------------------------------------|------------------------------------------------------------------|-----------------------------------------------------|-------------------------------------------------|------------------------------------------------|-------------------------------------------|
| <i>Assay</i>                              |                                                                  |                                                     |                                                 |                                                |                                           |
| FISH                                      | 1.15<br>(1.04, 1.27)<br>17                                       | 0.80<br>(0.67, 0.95)<br>15                          | 0.98<br>(0.78, 1.22)<br>7                       | 1.91<br>(0.97, 3.78)<br>3                      | -0.55<br>(-2.12, 1.01)<br>6               |
| RT-PCR                                    | 1.19<br>(1.06, 1.33)<br>12                                       | 0.94<br>(0.65, 1.37)<br>11                          | 1.18<br>(0.76, 1.84)<br>9                       | 0.20<br>(0.06, 0.67)<br>1                      | -0.72<br>(-2.11, 0.68)<br>7               |
| IHC                                       | 1.29<br>(1.19, 1.40)<br>4                                        | 0.82<br>(0.51, 1.32)<br>4                           | 0.99<br>(0.88, 1.11)<br>3                       | 1.00<br>(0.66, 1.50)<br>1 <sup>a</sup>         | -0.93<br>(-1.73, -0.13)<br>2              |
| <i>P for Effect Modification by Assay</i> |                                                                  |                                                     |                                                 |                                                |                                           |
|                                           | 0.09                                                             | 0.62                                                | 0.95                                            | 0.58                                           | 0.47                                      |

Abbreviations: FISH – Fluorescence In Situ Hybridization; IHC – Immunohistochemistry; RR – Risk Ratio; RT-PCR – Reverse Transcription Polymerase Chain Reaction; WMD – Weighted Mean Difference

<sup>a</sup> Only includes data from PHS / HPFS
